# Supplementary material for: Automated recognition of postures and drinking behaviour for the detection of compromised health in pigs
Source: PubMed Central journal article supplement (PMC7423952; doi:10.1038/s41598-020-70688-6), 2020-08-12
Supplement: 41598_2020_70688_MOESM1_ESM.pdf [file 41598_2020_70688_MOESM1_ESM.pdf]

# Automated recognition of postures and drinking behaviour for the detection of compromised health in pigs

Ali Alameer<sup>1,2,\*</sup>, Ilias Kyriazakis<sup>3,+</sup>, and Jaume Bacardit<sup>2,+</sup>

<sup>1</sup>*School of Natural and Environmental Sciences, Newcastle University, Newcastle Upon Tyne, NE1 7RU, UK*

<sup>2</sup>*School of Computing, Newcastle University, Newcastle Upon Tyne, NE4 5TG, UK*

<sup>3</sup>*Institute for Global Food Security, Queen's University, Belfast, BT9 5DL, UK*

\**Ali.Alameer@Newcastle.ac.uk*

+*these authors contributed equally to this work*

| Anchor box size | Anchor box dimension                                            |
|-----------------|-----------------------------------------------------------------|
| 2               | $w = [119; 65], h = [52; 75]$                                   |
| 3               | $w = [121; 61; 107], h = [44; 75; 69]$                          |
| 4               | $w = [107; 58; 122; 66], h = [71; 80; 46; 69]$                  |
| 5               | $w = [119; 53; 120; 82; 76], h = [61; 75; 40; 83; 68]$          |
| 6               | $w = [125; 52; 118; 74; 111; 23], h = [54; 75; 39; 75; 71; 32]$ |

**Supplementary Table S1.** Dimensions, *i.e.*, width ( $w$ ) and height ( $h$ ), of the obtained sets of anchor boxes. The K-medoids clustering method was utilised to estimate the above values to represent the scale and aspect ratio of pigs across all classes of the training dataset.

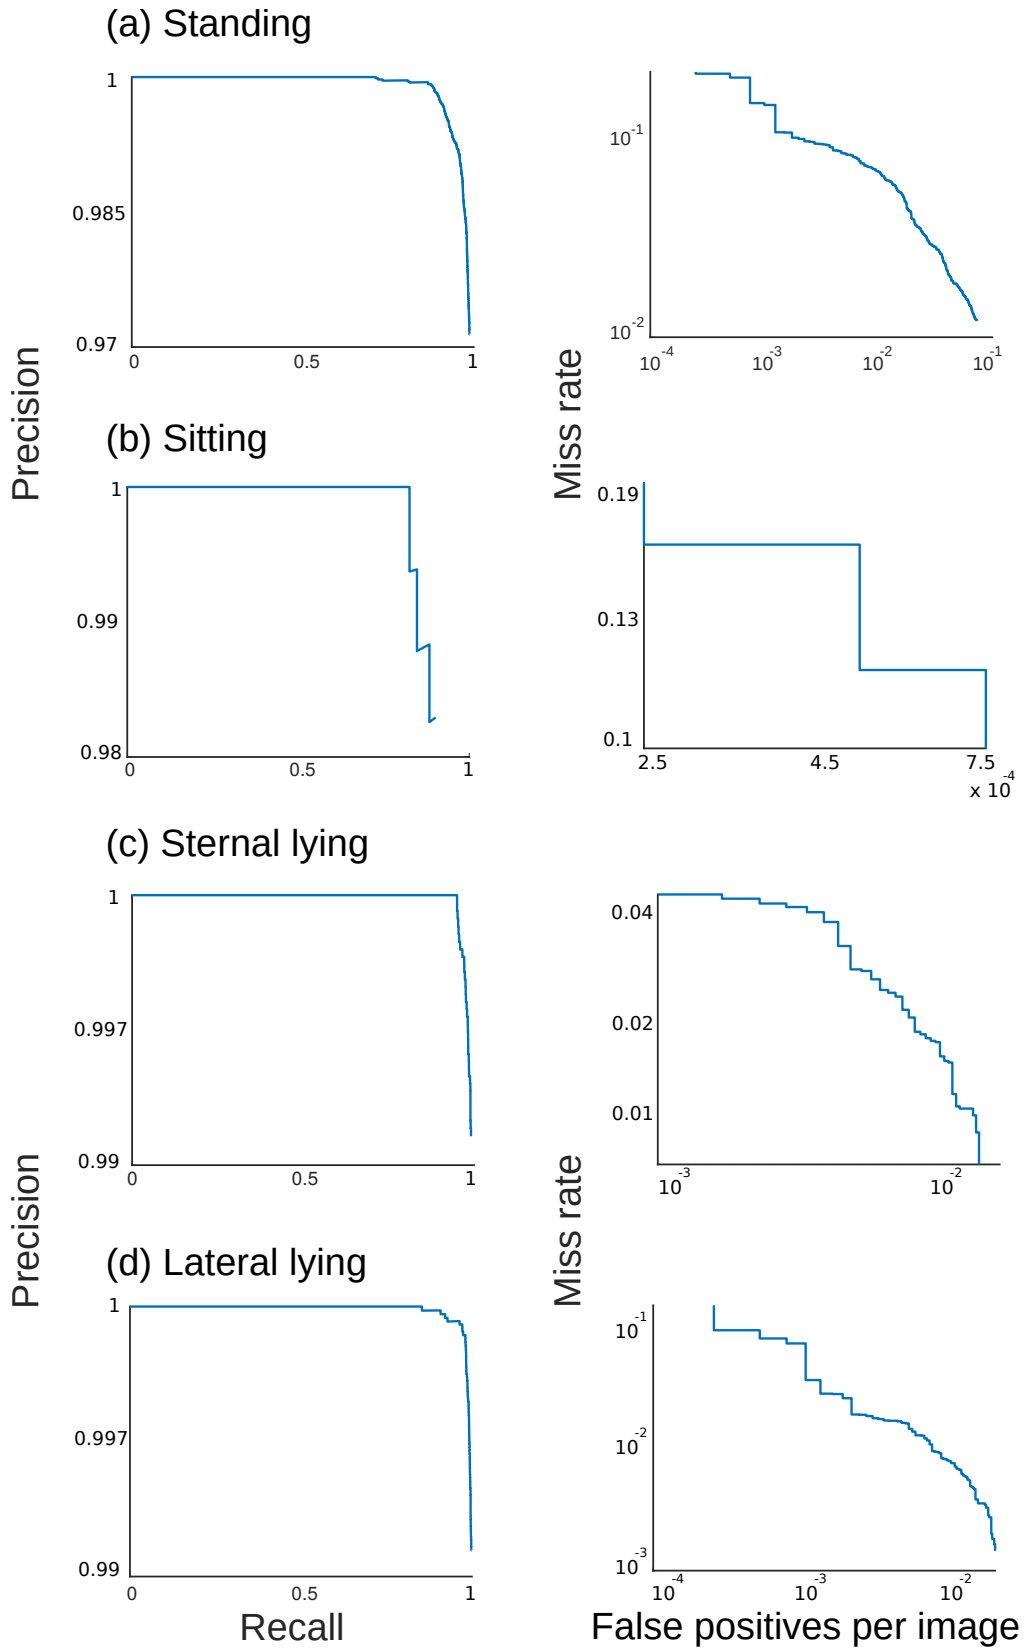

**Supplementary Figure S1.** The performance of the primary model against data from another commercial pig trial. Left column: precision-recall curve. Right column: miss rate against FPPI; both axes are logarithmically scaled.
